1 **Resistance profiling of *Aspergillus fumigatus* to olorofim indicates absence of**  
2 **intrinsic resistance and unveils the molecular mechanisms of acquired olorofim**  
3 **resistance**

4

5 Jochem B. Buil,<sup>a,b#</sup> Jason D. Oliver,<sup>c</sup> Derek Law,<sup>c</sup> Tim Baltussen,<sup>a</sup> Jan Zoll,<sup>a,b</sup> Margriet W.J.  
6 Hokken,<sup>a</sup> Marlou Tehupeiry-Kooreman,<sup>a,b</sup> Willem J.G. Melchers,<sup>a,b</sup> Mike Birch,<sup>c</sup> Paul E.  
7 Verweij,<sup>a,b</sup>

8

9 <sup>a</sup>Department of Medical Microbiology, Radboud University Medical Center, Nijmegen, The  
10 Netherlands.

11 <sup>b</sup>Radboudumc-CWZ Center of Expertise for Mycology, Nijmegen, The Netherlands.

12 <sup>c</sup>F2G Ltd, Lankro Way, Manchester, United Kingdom

13

14 Running Head: Mechanism of olorofim resistance in *A. fumigatus*

15

16

17 **Abstract** (228 words)

18 Olorofim (F901318) is a new antifungal currently under clinical development that shows both  
19 in vitro and in vivo activity against a number of filamentous fungi including *Aspergillus*  
20 *fumigatus*. In this study we screened *A. fumigatus* isolates for intrinsic olorofim-resistant *A.*  
21 *fumigatus* and evaluated the ability of *A. fumigatus* to acquire an olorofim-resistant  
22 phenotype. No intrinsic resistance was found in 975 clinical *A. fumigatus* isolates. However,  
23 we found that isolates with increased olorofim MICs (> 8 mg/L) could be selected using a  
24 high number of conidia and olorofim exposure under laboratory conditions. Assessment of  
25 the frequency of acquired olorofim resistance development of *A. fumigatus* was shown to be  
26 higher than for voriconazole but lower than for itraconazole. Sequencing the *PyrE* gene of  
27 isogenic isolates with olorofim MICs of >8 mg/L identified various amino acid substitutions  
28 with a hotspot at locus G119. Olorofim was shown to have reduced affinity to mutated target  
29 protein dihydroorotate dehydrogenase (DHODH) and the effect of these mutations were  
30 proven by introducing the mutations directly in *A. fumigatus*. We then investigated whether  
31 G119 mutations were associated with a fitness cost in *A. fumigatus*. These experiments  
32 showed a small but significant reduction in growth rate for strains with a G119V substitution,  
33 while strains with a G119C substitution did not exhibit a reduction in growth rate. These in  
34 vitro findings were confirmed in an in vivo pathogenicity model.

35

36 **Importance** (61 words)

37 Olorofim represents an important new treatment option for patients with difficult to treat  
38 invasive fungal infections, including triazole-resistant *A. fumigatus* infection. Our study  
39 provides insights into one resistance mechanism and the potential dynamics of olorofim  
40 resistance, which will help to prevent and manage resistance selection. Such insights are  
41 critical to antifungal stewardship and to safeguard its prolonged use in clinical practice.

## 42 Introduction

43 It is estimated that around 250,000 people worldwide suffer from invasive aspergillosis  
44 annually (1). Patients at risk include those with neutropenia and in recent years cases have  
45 been increasingly observed in intensive care unit patients, including those with severe  
46 influenza and coronavirus infection (2-6). The triazoles voriconazole and isavuconazole are  
47 the recommended first line agents for the management of invasive aspergillosis (7, 8). The  
48 use of other registered antifungal agents such as liposomal amphotericin B is limited due to  
49 toxicity while the echinocandins exhibit lower efficacy against *Aspergillus* compared to the  
50 triazoles. Furthermore, the triazoles are currently the only agents that can be administered  
51 orally. However, the use of triazoles is threatened by the emergence of azole resistance in  
52 *Aspergillus fumigatus*, (9) which has now been reported globally (10, 11). Voriconazole  
53 resistance in *A. fumigatus* infection was associated with a near doubling of mortality at day  
54 42 compared to voriconazole susceptible infection in patients that were treated with  
55 voriconazole (12). Azole resistance is mainly driven by environmental exposure of *A.*  
56 *fumigatus* to azole fungicides, which selects for fungicide resistance mutations that confer  
57 cross resistance to medical triazoles. In regions with environmental resistance, any patient  
58 may present with azole-resistant invasive aspergillosis that complicates diagnosis and  
59 successful therapy. Thus, there is an urgent need for new antifungal agents with efficacy  
60 against both azole-susceptible and azole-resistant *A. fumigatus* infection.

61 Olorofim (F901318) is a new antifungal currently under clinical development that shows  
62 activity against a number of filamentous fungi including *A. fumigatus*. It belongs to a new  
63 orotomide class of antifungals and acts by selective inhibition of fungal dihydroorotate  
64 dehydrogenase (DHODH), an essential enzyme within the *de novo* pyrimidine biosynthesis  
65 pathway (13, 14). The spectrum of activity of olorofim includes *Aspergillus* species including  
66 cryptic *Aspergillus* species and azole-resistant *Aspergillus* isolates, (15-22) *Lomentospora*  
67 *prolificans*, *Scedosporium* species (14, 23-27), agents of endemic mycoses such as  
68 *Coccidioides* species, *Histoplasma* species, *Sporothrix schenckii* and *Blastomyces* species  
69 (14, 28). Furthermore, in vitro studies show activity against *Madurella mycetomatis* (29),

70 *Microascus/Scopulariopsis*, *Penicillium*, *Paecilomyces*, *Purpureocillium*, *Rasamsonia* and  
71 *Talaromyces* species (14, 30). The *in vitro* activity was confirmed in *in vivo* models for  
72 pulmonary aspergillosis with azole-susceptible and azole-resistant isolates of *A. fumigatus*  
73 (14, 22), in a murine model of disseminated *A. terreus* aspergillosis (31), a murine model of  
74 chronic granulomatous disease infected with *A. fumigatus*, *A. nidulans*, and *A. tanneri* (18)  
75 and in a murine model of central nervous system coccidioidomycosis (28).

76 Antifungal drug resistance may develop through genetic variation that is created by the  
77 fungus to enable its adaptation to stress factors in its environment. Although drug exposure  
78 is not relevant to the development of resistance mutations per se, antifungal drug selection  
79 pressure is critical to create dominance of resistant cells within a population of fungal cells.

80 The risk of resistance selection to a new class of antifungal drugs such as the orotomides will  
81 depend on the frequency of spontaneous mutations that confer an orotomide-resistant  
82 phenotype and the extent of selection pressure through patient therapy. In this study we  
83 screened for intrinsic olorofim-resistant *A. fumigatus*, evaluated the ability of *A. fumigatus* to  
84 develop an olorofim-resistant phenotype, and characterized underlying olorofim resistance  
85 mechanisms, including the effect of mutated DHODH on olorofim affinity and the impact of  
86 resistance mutations on virulence in a mouse model of disseminated aspergillosis. Lastly, the  
87 effect of mutated DHODH on conferring olorofim resistance in *A. fumigatus* was proven by  
88 introducing the mutation in a wildtype *A. fumigatus* strain.

89

90 **Results**

91

92 **Agar based screening of resistance.** A total of 976 clinical *A. fumigatus* isolates were  
93 screened for olorofim non-wildtypes on agar plates containing 0.125 mg/L olorofim. Only one  
94 isolate showed growth on the agar well supplemented with 0.125 mg/L olorofim (isolate  
95 V179-44). No growth on plates containing 0.125 mg/L olorofim was seen in the other 975  
96 isolates.

97 **Identification of acquired resistance in *A. fumigatus*.** Clinical *A. fumigatus* isolate (V179-  
98 44) was identified as possibly olorofim resistant and in vitro susceptibility testing using a  
99 spore suspension derived directly from the agar well supplemented with 0.125 mg/L of  
100 olorofim, showed an olorofim MIC of >8 mg/L. Susceptibility testing from the initial culture of  
101 strain V179-44 resulted in a wildtype olorofim MIC of 0.031 mg/L. Identification of the  
102 resistant isolate through beta-tubulin sequencing confirmed the conventional identification as  
103 *A. fumigatus sensu strictu* (32). As we suspected selection of a colony with a spontaneous  
104 olorofim resistance mutation, we tried to replicate this observation. Inoculation of  $>1 \times 10^9$   
105 spores of three *A. fumigatus* isolates (AZN8196, V052-35 and V139-36) on three 90 mm petri  
106 dishes with RPMI1620 agar supplemented with 2% glucose containing 0.5 mg/L olorofim,  
107 two olorofim-non-wildtype *A. fumigatus* colonies were retrieved from parental strain AZN8196  
108 (AZN8196\_OLR1 and AZN8196\_OLR2), three from V052-35 (V052-35\_OLR1 to  
109 V052\_OLR3) and 11 from V139-36 (V139-36\_OLR1 to V139-36-OLR11).

110 **In vitro frequency of spontaneous mutations resulting in olorofim resistance in**  
111 **asexual sporulation.** Six *A. fumigatus* isolates (ATCC 204305, AZN8196, V052-35  
112 (TR<sub>34</sub>/L98H), V139-36, V180-37 and V254-51 (Table 1) were used for the resistance  
113 frequency experiment. A total of 131 olorofim non-wildtype strains were retrieved, all of which  
114 showed an olorofim MIC of >8 mg/L (Table S1). An olorofim resistance frequency of  $1.3 \times 10^{-7}$   
115 to  $6.9 \times 10^{-9}$  was observed (Figure 1). The mean itraconazole resistance frequency was

116 between  $1.2 \times 10^{-6}$  and  $3.3 \times 10^{-8}$  and the mean voriconazole resistance frequency was  
117 between  $1.8 \times 10^{-8}$  and  $2.0 \times 10^{-10}$ . Overall, the frequency of resistance was higher for  
118 itraconazole compared to olorofim, while voriconazole had the lowest frequency of  
119 resistance. The frequency of resistance of olorofim was significantly lower than itraconazole  
120 for strains AZN8196 and V254-51, while the frequency was not significantly lower for strains  
121 ATCC204305, V139-36 and V180-37. The frequency of voriconazole resistance was  
122 significantly lower compared with olorofim for strains ATCC204305, AZN8196, V139-36 and  
123 V254-51, while no significant differences were observed for strain V180-37. The second  
124 independent resistance frequency analysis using isolate Af293, which was cultured on yeast  
125 nitrogen base agar with glucose supplemented with 0.25 mg/L olorofim resulted in a mean  
126 frequency of olorofim resistance of  $1.7 \times 10^{-9}$ , a rate comparable to the above experiments. A  
127 total of 11 isolates were retrieved from parent strain Af293 of which 10 had an olorofim MIC  
128 of  $>8$  mg/L while one had a MIC of 0.25 mg/L (Table S1).

129

130 **Sequencing of *pyrE* identifies a hotspot for olorofim resistance at Gly119.** The target of  
131 olorofim has been identified as the pyrimidine biosynthetic enzyme DHODH, which in *A.*  
132 *fumigatus* is encoded by the *pyrE* gene. When sequencing the full *pyrE* gene of olorofim  
133 strains retrieved from parent strain Af293, we found mutations at locus G119 in 10 of 11  
134 sequenced olorofim-non-wildtype isolates. A single isolate with an olorofim MIC of 0.25 mg/L  
135 had a *pyrE* sequence identical to the parent Af293 strain. Subsequent analysis of a subset of  
136 39 isolates from the resistance frequency analysis, showed that mutations that resulted in an  
137 amino acid substitution at G119 were present in 38/39 isolates. In total 7 isolates had a  
138 G119A amino acid substitution, while we found G119C (21 isolates), G119F (1 isolate),  
139 G119Y (1 isolates), G119S (11 isolates), and G119V (7 isolates) amino acid substitutions in  
140 the other isolates. One olorofim-resistant isolate harbored a H116P amino acid substitution in  
141 the *PyrE* gene (Table 2).

142 **Confirmation of the resistance mechanism.** We investigated the effect that selected  
143 mutations at G119 had on the ability of olorofim to inhibit recombinant *A. fumigatus* DHODH.  
144 Recombinant DHODH with the amino acid substitutions G119A, G119V G119S and G119C  
145 showed significantly higher IC<sub>50</sub> values for olorofim compared to wildtype DHODH (Figure 2).  
146 The substitutions at G119 thus result in decreased inhibition of *A. fumigatus* DHODH by  
147 olorofim, confirming the olorofim resistance mechanism.

148 **G119 transformations using CRISPR/Cas9.** To further prove that the *PyrE* G119 mutations  
149 in *A. fumigatus* result in increased MICs to olorofim, we introduced the G119C mutation in *A.*  
150 *fumigatus* by a marker free CRISPR-Cas9 method in strain MFIG001 (33, 34). MFIG001 is a  
151 strain deficient in the non-homologous end-joining pathway resulting in a high transformation  
152 rate. Single colonies from the transformations were subcultured on Sabouraud dextrose agar  
153 (SDA) slants and screened for olorofim resistance on an agar plate containing 0.5 mg/L  
154 olorofim. Three strains (MFIG001\_pyrE<sup>G119C</sup>\_01, MFIG001\_pyrE<sup>G119C</sup>\_03 and  
155 MFIG001\_pyrE<sup>G119C</sup>\_05) that grew on the olorofim containing plate were selected for *PyrE*  
156 sequencing and subsequent MIC testing confirming the presence of the presence of G119C  
157 mutations (including the transformation specific synonymous PAM site mutation) (Figure S2)  
158 and olorofim MICs of >8 mg/L.

159 **Influence of *PyrE* substitution on radial growth rate.** As development of resistance is  
160 often associated with attenuated virulence (35), we investigated the effects of olorofim  
161 resistance mutations on the fitness of *A. fumigatus*. To assess the impact of substitution of  
162 G119 in the *PyrE* gene on fitness, we used *in vitro* radial growth experiments. Mean growth  
163 curves are shown in Figure 3. The mean radial growth at day 5 of AZN8196\_OLR1 (carrying  
164 the G119V mutation) was 30.7 mm, which was significantly different to the wildtype parent  
165 strain AZN8196 which had a mean growth of 40.0 mm ( $p < 0.001$ ). The mean radial growth of  
166 AZN8196\_OLR2 (G119C) was 35.8 mm, also slightly reduced compared to strain AZN8196  
167 but not significantly ( $P = 0.06$ ). The mean growth at day 5 was 42.7 mm for Af293, which was  
168 not significantly different compared with the mean growth at day of strain Af293\_OLR7

169 (G119C), which had a mean growth 43.2 mm. The mean 5-day growth of Af293\_OLR5  
170 (G119S) was slightly decreased compared to parent at 39.5 mm ( $p=0.0039$ ). Once more the  
171 glycine to valine mutation had the greater effect on growth with Af293\_OLR9 growing 28.8  
172 mm, 14.4 mm less than the parental strain ( $p=0.0010$ ). Thus, in two different *A. fumigatus*  
173 strains the G119V mutants grew significantly more slowly than the parental strain (Figure 3).

#### 174 ***Pathogenicity of olorofim-resistant A. fumigatus strains in an in vivo murine model.***

175 Although the radial growth rate experiments did not reveal significant fitness cost for two of  
176 the tested isolates, we wanted to confirm these observations in a neutropenic murine  
177 infection model. All strains demonstrated virulence with all animals succumbing to disease by  
178 96 hours post infection. Median survival times of animals infected with AZN8196,  
179 AZN8196\_OLR1 (G119V) and AZN8196\_OLR2 (G119C) were 68.13, 89.75 and 73.38 hours  
180 after infection, respectively. Mice infected with AZN8196\_OLR1 (G119V) survived  
181 significantly longer than those infected with their parent strain. There were no significant  
182 differences between mice infected with AZN8196\_OLR2 (Figure 4a).

183 Median survival times of animals infected with Af293, Af293\_OLR5 (G119S), Af293\_OLR7  
184 (G119C), and Af293\_OLR9 (G119V) at a concentration of approximately  $5 \times 10^6$  CFU/mouse  
185 were 45.25, 46.75, 48.25 and 55 hours post infection, respectively. No difference in survival  
186 time was found between animals infected with Af293 and those infected with Af293\_OLR5  
187 (G119S) and Af293\_OLR7 (G119C). However, Af293\_OLR9 (G119V)-infected animals  
188 survived significantly longer than Af293-infected mice (Figure 4b).

189 Whilst the other mutants tested appeared as virulent as their parental strains, the two G119V  
190 mutant strains generated from different parents survived for longer. This is consistent with  
191 the slower growth observed for these strains in the radial growth experiments. These strains  
192 appear less fit than the wild type both *in vitro* and *in vivo*.

193



194 **Discussion**

195 Evaluation of a large collection of clinical *A. fumigatus* isolates showed that the olorofim  
196 resistance frequency is negligible and no cross resistance with azoles was detected.  
197 However, olorofim resistance can be selected for under laboratory conditions and is  
198 associated with point mutations at locus G119 of the *PyrE* gene. Such mutations confer a  
199 resistant olorofim phenotype (olorofim MICs >8 mg/L), which appeared to have variable  
200 effects on virulence.

201 Olorofim is a promising novel antifungal with in vitro and in vivo efficacy against *A. fumigatus*  
202 infection, including triazole-resistant cases. The drug is currently undergoing phase II  
203 evaluation for treatment of patients with invasive fungal infections that cannot be managed  
204 with current agents. Screening of over 900 clinical *A. fumigatus* isolates showed intrinsic  
205 resistance is not identified, confirming the results from susceptibility testing of 1,032 clinical  
206 *A. fumigatus* isolates from Denmark (15).

207 Olorofim resistance in *A. fumigatus* has not been reported before. A previous evolution  
208 experiment involving 50 passages of *A. fumigatus* exposed to an olorofim concentration  
209 gradient, resulted only in a modest olorofim MIC increase. In contrast voriconazole generated  
210 a four-fold increase in MIC after only 15 passages (14). In the present study, we observed  
211 the *in vitro* acquisition of olorofim resistance while screening for intrinsic resistance using an  
212 agar supplemented with olorofim. All strains that were screened for olorofim resistance using  
213 this method were inhibited on this olorofim-containing agar, except one isolate. The olorofim-  
214 containing agar well of this strain showed growth of a single colony, in contrast to the growth  
215 control that showed confluent growth of numerous colonies on the whole agar surface. Had  
216 the initial isolate been resistant, we would have also expected numerous colonies growing in  
217 the olorofim-containing agar similar to the growth control. The lack of this growth, together  
218 with the discrepant results from the susceptibility testing of the parental colony and the  
219 colony growing on the olorofim-containing agar led us to believe that the resistant isolate had  
220 acquired olorofim resistance while being cultured on olorofim-containing agar.

221 By using a high inoculum of  $1 \times 10^9$  CFU/mL we found that isolates with increased olorofim  
222 MICs ( $> 8$  mg/L) could indeed be selected confirming our previous observation. As we  
223 wanted to understand the implications of this observation, we assessed the frequency of  
224 resistance development of *A. fumigatus* to olorofim and compared this frequency to other  
225 clinically used triazoles. We have chosen itraconazole and voriconazole as comparator  
226 agents as resistance development has been described in patients receiving long-term  
227 therapy for (cavitating) chronic pulmonary aspergillosis (CPA) but not in patients treated for  
228 acute invasive aspergillosis (36, 37). We found that the resistance frequency of itraconazole  
229 was higher than the resistance frequency found for voriconazole. Similar observations are  
230 seen in the treatment of patients with CPA where the rate of emergence of azole resistance  
231 during therapy was 13% for itraconazole and 5% for voriconazole (38). Differences in  
232 resistance frequency between itraconazole and voriconazole may be explained by the fact  
233 that almost all azole resistance associated substitutions reported in the *Cyp51A* gene result  
234 in itraconazole MICs above 4 mg/L, while only few substitutions result in high-level resistance  
235 to voriconazole (39). The finding of spontaneous olorofim resistance mutations is not  
236 surprising, but the frequency appears to be relatively low. The conditions that enable *in vivo*  
237 selection of olorofim resistance may be similar to those for triazole resistance; a setting of a  
238 high number of replicating fungal cells and chronic drug exposure. Such conditions may be  
239 present in patients with cavitary pulmonary lesions, such as aspergilloma and CPA but are  
240 unlikely in patients with acute invasive aspergillosis. However, as there are currently no  
241 alternative antifungal agents available for treatment of patients with triazole-resistant CPA  
242 that can be administered orally, olorofim represents a promising treatment option for this  
243 patient group that requires further clinical evaluation.

244 Importantly, *in vivo* selection of resistance mutations during treatment is not observed in  
245 patients treated for invasive aspergillosis. Triazole resistance in acute invasive aspergillosis  
246 is caused by inhalation of triazole-resistant *A. fumigatus* conidia that have developed  
247 resistance in the environment through exposure to azole fungicides, which occurred over

248 several decades of exposure (40). Agents that inhibit DHODH as mode of action are  
249 currently not used for crop protection; to prevent a similar scenario to environmental triazole  
250 resistance selection, the use of similar mode of action compounds for medical and  
251 environmental applications should be avoided.

252 DHODH is an essential enzyme in the *de novo* pyrimidine biosynthesis pathway, and  
253 disruption of this pathway results in attenuated virulence in *A. fumigatus* (41). Similar  
254 observations are reported in other fungal species like *Candida albicans*, *Cryptococcus*  
255 *neoformans* and *Histoplasma capsulatum* and the necessity of an undisrupted pyrimidine  
256 biosynthesis pathway is demonstrated in both *in vitro* and *in vivo* models (42-44). As  
257 DHODH, the product of the *pyrE* gene, is the enzyme target of olorofim action, we  
258 hypothesized that the most likely target of resistance is the *pyrE* gene (14). Indeed,  
259 sequencing the *PyrE* gene of isolates with olorofim MICs of >8 mg/L identified various amino  
260 acid substitutions. A homology model of the *A. fumigatus* DHODH predicted a potential  
261 binding mode for olorofim (14). Locus G119, located within this binding site was identified as  
262 a specific hotspot for olorofim resistance in *A. fumigatus* as 48/49 sequenced isolates had  
263 amino acid substitutions at G119. A single isolate had an amino acid substitution at position  
264 H116 which was predicted as a key residue for olorofim binding (14). The effect on olorofim  
265 susceptibility of mutations in *PyrE* at locus G119 was proven by both olorofim inhibition  
266 assay of mutant recombinant DHODH and by introducing the *PyrE* G119C mutation directly  
267 in *A. fumigatus*.

268 It remains uncertain whether locus G119 will also be the main mechanism of resistance if  
269 olorofim resistant *pyrE* isolates eventually emerge in clinical practice. However, similar in  
270 vitro resistance induction experiments were performed for triazole resistance in *A. fumigatus*.  
271 The mutations found in these in vitro experiments, like the amino acid substitutions at locus  
272 G54 and locus M220 in the *Cyp51A* gene can also be found in isolates retrieved from  
273 patients with CPA who are treated for long periods with triazoles, indicating that such in vitro

274 experiments may predict the resistance mechanisms that can be found through clinical use  
275 (45, 46).

276 As development of antifungal resistance is often associated with attenuated virulence (35),  
277 we investigated whether amino acid substitutions in *pyrE* at locus G119 mutations were  
278 associated with a fitness cost in *A. fumigatus*. Analysis of *A. fumigatus* with disrupted *chsC*  
279 and *chsG* which encode Class III chitin synthases, showed a reduced colony radial growth  
280 rate compared to the wildtype strain. Subsequent assessment of pathogenicity in neutropenic  
281 mice showed a reduction in mortality in the mice inoculated with a *chsC* and *chsG* disrupted  
282 strain compared to the wildtype isolates (47). Similar correlations between growth rate and  
283 virulence were observed when the growth rate of *A. fumigatus* was assessed in 96-wells  
284 plates using the optical density as indicator for growth rate (48). To understand whether *PyrE*  
285 amino-acid substitutions influence fitness of *A. fumigatus* which may be extrapolated to *in*  
286 *vivo* pathogenicity, we analyzed the radial growth rate of five isolates with *PyrE* substitutions.  
287 These experiments showed a small but significant reduction in growth rate for strains with a  
288 G119V substitution (strain AZN8196\_OLR1 and Af293\_OLR9), while strains with a G119C  
289 substitution did not exhibit a reduction in growth rate. These *in vitro* findings were confirmed  
290 in the *in vivo* pathogenicity model whereas no significant difference in survival was observed  
291 for isolates with a G119C amino acid substitution (isolates AZN8196\_OLR2 and  
292 Af293\_OLR7). These results indicate that the amino acid substitution affects the binding of  
293 olorofim to DHODH but may not affect the function of DHODH itself and the effect on  
294 DHODH function is dependent on the underlying amino acid substitution. Furthermore,  
295 compensatory evolution has been shown to occur in triazole-resistant *A. fumigatus* isolates  
296 when cultured in azole-free conditions, indicating that a potential fitness cost can be  
297 overcome (49). However, population dynamics such as competition with other (wildtype)  
298 genotypes and selection pressure will ultimately determine which genotype will become  
299 dominant.

300 Olorofim represents an important new treatment option for patients with difficult to treat  
301 invasive fungal infections, including triazole-resistant *A. fumigatus* infection. Our study  
302 provides insights into one mechanisms and potential dynamics of olorofim resistance, which  
303 will help to prevent and manage resistance selection in various patient groups. Such insights  
304 are critical to antifungal stewardship and to safeguard its prolonged use in clinical practice.

305

306

## 307 **Material and Methods**

308

309 **Agar based screening of resistance.** We screened 976 clinical *A. fumigatus* isolates that  
310 were cultured between 2015 and 2017 for non-wildtype olorofim phenotypes. Inoculum with a  
311 density of approximately 0.5 McFarland was prepared in sterile 0.9% NaCl with 0.1% Tween  
312 20 and one drop of 25 µl was used to inoculate an agar plate (RPMI1640 with 2% glucose)  
313 containing 0.125 mg/L olorofim. An agar plate containing only RPMI1640 with 2% glucose  
314 agar was used as growth control. Olorofim MIC-testing was performed on isolates growing  
315 on the agar plate containing olorofim. If routine susceptibility results indicated resistance to  
316 voriconazole or itraconazole, the *Cyp51A* gene was subsequently sequenced.

317 **Minimal inhibitory concentration of olorofim.** Susceptibility testing was performed using  
318 the EUCAST method for susceptibility testing of molds E.Def.9.3.1 (EUCAST.org). Olorofim  
319 pure powder was obtained from F2G (Manchester, United Kingdom). Stock solutions of  
320 olorofim were prepared in DMSO. 96-wells plates with 2-fold dilutions of olorofim were  
321 prepared in RPMI1680 with 2% glucose and buffered with MOPS. The olorofim concentration  
322 range used was 0.016–8 mg/liter. Inoculum was prepared in sterile 0.9% NaCl with 0.1%  
323 Tween 20. Spores were harvested from mature culture and the suspension was adjusted to  
324 80-82 % transmission at 530 nm (Spectrofotometer Genesys 20) to create a  $1 - 4.2 \times 10^6$   
325 CFU/ml spore suspension (50). Inocula were added to the 96-well plates to create a final  
326 concentration of  $2 - 5 \times 10^5$  CFU/ml in each well. The inoculated plates were incubated for  
327 48 h at 35 °C. MIC was defined as the lowest concentration without visible growth.

328 **Selection of resistant mutants** Six *A. fumigatus* isolates (ATCC 204305, AZN8196, V052-  
329 35 (TR<sub>34</sub>/L98H), V139-36, V180-37 and V254-51) were used for the olorofim resistance  
330 induction experiment. Sabouraud dextrose broth containing chloramphenicol (SAB-c) was  
331 inoculated and cultures were grown at 28°C. Spores were harvested in sterile saline with  
332 0.05% tween 20 and the inoculum was transferred to a sterile vial. The spore suspension  
333 was adjusted to  $1 \times 10^9$  spores/mL using an hemocytometer. One mL spore suspension was

334 added to a 90 mm agar plate containing RPMI 1640 +2% glucose (1.5% agar) containing 0.5  
335 mg/L olorofim. Cultures were grown at 30°C. Isolates that grew on the olorofim containing  
336 plates were subcultured on SAB-c for subsequent MIC testing and DNA isolation

337 **Frequency of resistance analysis.** Six *A. fumigatus* isolates (ATCC 204305, AZN8196,  
338 V052-35 (TR34/L98H), V139-36, V180-37 and V254-51) were used for the olorofim resistance  
339 induction experiment (Table 2). SAB-c was inoculated using a single spore isolated from the  
340 six parent strains and cultures were grown at 28°C. Spores were harvested in sterile saline  
341 with 0.05% tween 20 and the inoculum was transported to a sterile vial. The spore  
342 suspension was adjusted to  $1 \times 10^9$  spores/mL using a hemocytometer. One mL spore  
343 suspension was added to a 90 mm agar plate containing RPMI 1640 +2% glucose (15%  
344 agar) containing either 0.5 mg/L olorofim, 4 mg/L voriconazole or itraconazole 8 mg/L. These  
345 concentrations were chosen as these were the concentrations which are 2 dilutions higher  
346 than the concentration that inhibits 100% of wildtype *A. fumigatus* isolates (51). Cultures were  
347 grown at 30°C. Isolates that grew on the olorofim containing plates were subcultured on  
348 SAB-c for subsequent MIC testing and DNA isolation. The resistance rate was calculated by  
349 dividing the number of retrieved resistant colonies by the number of inoculated spores and  
350 the mean of 5 experiments was used for comparison. Differences in resistance frequency  
351 between olorofim and itraconazole or voriconazole were tested for significance using the  
352 student T test. Statistical significance was defined as a *P* value of  $\leq 0.05$  (two-tailed). To  
353 confirm the resistant rates, a second experiment was performed in another laboratory. Spore  
354 stocks of *A. fumigatus* strain Af293 were prepared and inoculated onto yeast nitrogen base  
355 with glucose agar (YNBG) containing 0.25 mg/L olorofim. A total of  $8 \times 10^9$  spores were  
356 inoculated into 12 x 100 ml YNBG-OLO agar plates that were subsequently incubated for 5  
357 days at 35°C. Colonies growing on drug-containing plates were subcultured on YNBG-OLO  
358 to confirm resistance.

359 **Sequencing of *PyrE* identifies hotspot at *Gly119*.** The *PyrE* gene of all isolates from  
360 parent strain Af293 were sequenced as previously described using primers AFDseq-F2 and

361 AFDseq-R2 (15). *PyrE* amino acid sequences of olorofim-resistant strains were compared to  
362 the amino acid sequence of the wildtype parent strains. As these and the earlier pilot  
363 experiments showed only amino acid substitutions at locus *G119* without mutations at other  
364 loci in *PyrE*, we sequenced only part of the *PyrE* gene for the other strains. This part of the *A.*  
365 *fumigatus* *PyrE* gene was sequenced using primer *PyrE\_G119\_Fwd*:  
366 *AGTAAAGGAGGCACCCAAGAAAGCTGG* and *PyrE\_G119\_Rev*:  
367 *GCCAATGGGGTTGTTGAGCGTATACCC*. We randomly selected 39 olorofim-resistant  
368 strains from the resistant frequency analysis.

369 ***Olorofim inhibition assays of mutant recombinant DHODH.*** The cloning of *A. fumigatus*  
370 *DHODH*<sub>(89-531)</sub> cDNA into protein expression vector pET44 yielding pET44AFD was described  
371 previously (14). For preparation of mutated protein this plasmid was mutated at codon 119  
372 using the Phusion Site-Directed Mutagenesis kit (Thermo Scientific). PCR reactions were set  
373 up with Phusion HSII polymerase, pET44AFD as a template, with one constant primer  
374 (*AFDSDM\_R1*; *CCTCTTCCGCGTCGGGATAA*) and a variable that had a single codon  
375 change (*CGCATCATATTxyzGTGGAAGCTCT*). The sequence of *xyz* (GGT in wild type)  
376 was: GTT for G119V; GCT for G119A; AGT for G119S; TGT for G119C. The PCR product  
377 representing a linear version of pET44AFD with the mutation present was ligated using T4  
378 DNA ligase and transformed into Max Efficiency DH5 $\alpha$  competent cells (Thermo Fisher).  
379 Sequencing confirmed the desired mutations were present. The constructs were transformed  
380 into *E. coli* BL21 (DE3) cells (Merck) and the mutant proteins were expressed and purified  
381 according to the protocol described by Oliver, et al (14). *DHODH* assays were set up in the  
382 presence and absence of olorofim at concentrations between 0.008 to 100  $\mu$ M. Assays were  
383 carried out in 50 mM Tris HCl pH8, 150 mM KCl, 10% (wt/vol) glycerol, and 0.1% (wt/vol)  
384 Triton X-100 in the presence of 1 mM L-dihydroorotic acid, 0.05 mM coenzyme Q2 and 0.1  
385 mM 2,6-dichloroindophenol as a redox indicator. The reaction was followed by absorbance at  
386 600 nm and reaction velocities used to construct IC50 curves. (14). Curves were fitted in  
387 GraphPad Prism using variable slope (four parameters) on log transformed data.



388 **G119 transformations using CRISPR-Cas9.** To prove that G119 mutations are resulting in  
389 increased olorofim MICs we introduced the G119C mutation in strain MFIG001 (34) as  
390 previously described (33). In short, protoplasts were generated by inoculation of  
391 approximately  $1 \times 10^6$  fresh conidia in Yeast extract Glucose medium (YG; 0.5% yeast  
392 extract, 2% glucose) for 16 hours at 37 °C shaking at 120 rpm. Mycelia were harvested by  
393 filtration and resuspended in YG with protoplasting buffer (5 g Vinotaste in 50 mL 1M KCl  
394 and 0.1 M Citric Acid added to 50 mL YG) and reincubated for 4 hours at 37 °C shaking at  
395 100 rpm. Then protoplast were washed 3 times in 0.6 M KCl and 50 mM CaCl<sub>2</sub> and the  
396 protoplast concentration was adjusted and diluted to approximately  $1 \times 10^6$  protoplasts. A  
397 PAM site close to the G119 locus was selected with an adjacent 20 nucleotide protospacer  
398 that covers the G119 locus using a web-based guide RNA designing tool EuPaGDT  
399 (doi:10.1099/mgen.0.000033). The genome sequence of *A. fumigatus* A1163  
400 (*Aspergillus\_fumigatus*A1163.ASM15014v1) was manually uploaded to EuPaGDT to design  
401 gRNAs to the *pyrE* locus. The program was carried out with the default settings and the  
402 crRNA with the highest QC score closest to the target integration was selected for  
403 transformation. A single stranded (ss) DNA repair template was selected that covered 50  
404 nucleotides on both sites of the protospacer and PAM site (Figure s1) that contains a  
405 synonymous point mutation in the PAM site and the T>G mutation in the G119 locus  
406 resulting in GGT (Glycine) to TGT (Cysteine) transformation. Alt-R® CRISPR-Cas9  
407 tracrRNA, Alt-R® CRISPR-Cas9 crRNA, Alt-R® S.p. Cas9 Nuclease and ssDNA repair  
408 template were ordered from Integrated DNA Technologies. Ribonucleoprotein (RNP)  
409 complex were assembled *in vitro* in Nuclease-Free IDTE buffer. RNP complex, the ssDNA  
410 repair template and PEG buffer ((60% wt/vol PEG3350, 50 mM CaCl<sub>2</sub>, 450 mM Tris-HCl, pH  
411 7.5) were mixed with 50 µl of the  $1 \times 10^6$  /ml protoplast and incubated on ice for 50 minutes.  
412 Then 1 mL of PEG 3350 was added to the solution and incubated for another 25 minutes at  
413 20 °C. The solution was incubated on five yeast extract peptone dextrose (YPD) agar plates  
414 and incubated for 48 hours. Single colonies were subcultured on SDA slants and screened  
415 for resistance by spotting 2 µL containing 100-500 conidia on RPMI1680 2% glucose agar

416 containing 0.125 mg/L olorofim and RPMI1680 2% glucose agar without olorofim as growth  
417 control. Five isolates showing prominent growth after 48 hours were selected and further  
418 analyzed by olorofim MIC testing and sequencing of the *pyrE* G119 hotspot as described  
419 earlier.

420 **Radial growth rate.** To study the radial growth rate we randomly selected five olorofim-  
421 resistant isolates, two from strain AZN8196 (AZN8196\_OLR1, AZN8196\_OLR2) and three  
422 from strain Af293 (Af293\_OLR5, Af293\_OLR7, and Af293\_OLR9) from the initial induction  
423 experiments and compared the radial growth rate to the wildtype parent strain. The strains  
424 were chosen as these strains harbored the most common amino acid substitutions G119C,  
425 G119V and G119S. We assessed the growth by measuring the colony diameters in the  
426 horizontal axis and vertical axis once every 24 hours for a period of 5 days. We used an  
427 initial inoculum of  $2 \times 10^2$  spores, quantified with a hemocytometer for all strains and  
428 inoculated the spores in the middle of a 90mm petri dish with Yeast Nitrogen Base with  
429 glucose. We did three independent experiments per strain and reported the mean of the  
430 three experiments. Differences in growth rate in mm/day at day 5 between wildtype and  
431 olorofim-resistant strains were tested for significance using the student T test. Statistical  
432 significance was defined as a *P* value of  $\leq 0.05$  (two-tailed).

433 **Assessment of the pathogenicity of olorofim-resistant progeny compared to strain**  
434 **AZN8196 and Af293.** To study the virulence of isolates with *PyrE* amino-acid substitution,  
435 we assessed survival of these isolates in a murine model of disseminated aspergillosis and  
436 compared the survival to their wildtype parent strains. Ideally, truly isogenic isolates are used  
437 for such experiments. However, the selected isolates were selected for olorofim resistance  
438 on a plate and only the *PyrE* gene was sequenced and we thus cannot exclude amino acid  
439 substitutions elsewhere in the genome. To exclude effects of such additional substitutions we  
440 used five separately selected olorofim-resistant strains to perform the experiments. CD-1  
441 mice (Charles River Laboratories, Margate, UK) were immunosuppressed 3 days prior to  
442 infection with cyclophosphamide administered at 200mg/kg subcutaneously. Inoculum was

443 prepared for *A. fumigatus* strains AZN8196, AZN8196\_OLR1 , AZN8196\_OLR2, Af293,  
444 Af293\_OLR5, Af293\_OLR7, and Af293\_OLR9. Mice were infected by intravenous  
445 administration of 0.2mL conidial suspension. An inoculum of approximately  $5 \times 10^5$  CFU/mL  
446 was used for strains AZN8196, AZN8196\_OLR1, AZN8196\_OLR2 and an inoculum of  
447 approximately  $2.5 \times 10^7$  CFU/mL was used for strains Af293, Af293\_OLR5, Af293\_OLR7,  
448 and Af293\_OLR9 resulting in  $1 \times 10^5$  CFU/mouse and  $5 \times 10^6$  CFU/mouse respectively.  
449 These inocula were chosen as those are the LD<sub>90</sub> doses that were previously determined for  
450 these specific *A. fumigatus* strains (48, 52). The concentration of conidia was adjusted using  
451 a hemocytometer and confirmed by quantitative culture on SDA. Actual and intended  
452 inoculum levels are listed in table S1. Eight mice were inoculated with either strain. Mice  
453 were monitored for survival for 10 days and euthanized when they demonstrated high weight  
454 loss, signs of sepsis or severe torticollis. Survival data was analyzed using GraphPad Prism  
455 (Version 5.3) and checked for significance using the Log-rank (Mantel-Cox) Test. Statistical  
456 significance was defined as a *P* value of  $\leq 0.05$  (two-tailed).

457

458 **Conflict of interest**

459 J.B. reports grants from F2G Ltd and Gilead Sciences. J.O, D.L and M.B. are employees and  
460 shareholders of F2G Ltd. P.E. reports grants from Mundipharma, F2G Ltd, Pfizer, Gilead  
461 Sciences, and Cidara and nonfinancial support from IMMY for work outside the submitted  
462 study.

463

464 **Funding**

465 The study was supported by funding from F2G Ltd.

466 Tables and figures

467

468 Table 1. Strains used in this study for resistance frequency analysis

| Strain      | Cyp51A genotype        | Olorofim MIC (mg/L) | Voriconazole MIC (mg/L) | Itraconazole MIC (mg/L) |
|-------------|------------------------|---------------------|-------------------------|-------------------------|
| ATCC 204305 | wildtype               | 0.016               | 0.25                    | 0.125                   |
| AZN8196     | wildtype               | 0.031               | 0.25                    | 0.125                   |
| V052-35     | TR <sub>34</sub> /L98H | 0.031               | 8                       | >16                     |
| V139-36     | wildtype               | 0.063               | 0.25                    | 0.25                    |
| V180-37     | wildtype               | <0.016              | 0.5                     | 0.5                     |
| V254-51     | wildtype               | 0.031               | 0.25                    | 0.5                     |
| AF293       | wildtype               | 0.016               | 0.5                     | 0.5                     |

469

470 Table 2. Mutations in the *PyrE* gene in isolates selected for olorofim resistance

| Parent Strain | Cyp51A genotype        | Number of olorofim-resistant progeny sequenced strains | <i>PyrE</i> amino acid substitutions |       |       |       |       |       |       |
|---------------|------------------------|--------------------------------------------------------|--------------------------------------|-------|-------|-------|-------|-------|-------|
|               |                        |                                                        | G119A                                | G119C | G119F | G119Y | G119S | G119V | H116P |
| ATCC 204305   | wildtype               | 8                                                      | 1                                    | 5     |       |       | 2     |       |       |
| AZN8196       | wildtype               | 6                                                      | 2                                    | 2     |       |       | 1     | 1     |       |
| V052-35       | TR <sub>34</sub> /L98H | 4                                                      |                                      | 4     |       |       |       |       |       |
| V139-36       | wildtype               | 9                                                      | 1                                    | 4     |       | 1     | 1     | 2     |       |
| V180-37       | wildtype               | 4                                                      | 1                                    | 1     | 1     |       |       |       | 1     |
| V254-51       | wildtype               | 8                                                      | 2                                    | 2     |       |       | 4     |       |       |
| Af293         | wildtype               | 10                                                     |                                      | 3     |       |       | 3     | 4     |       |

471

472

473 **Table S1. Olorofim resistance progeny strains and corresponding MIC**

| <b>Strain</b>      | <b>Resistant strains retrieved in pilot experiment</b> | <b>Olorofim MIC</b> | <b>Resistant strains retrieved in resistance frequency experiment</b> | <b>Olorofim MIC</b>                                 |
|--------------------|--------------------------------------------------------|---------------------|-----------------------------------------------------------------------|-----------------------------------------------------|
| <b>ATCC 204305</b> |                                                        |                     | 33 strains: ATCC 204305_OLR1 to ATCC 204305_OLR33                     | 33 strains >8mg/L                                   |
| <b>AZN8196</b>     | 2 strains: AZN8196_OLR1 to AZN8196_OLR2                | 2 strains >8 mg/L   | 30 strains: AZN8196_OLR3 to AZN8196_OLR32                             | 30 strains >8 mg/L                                  |
| <b>V052-35</b>     | 3 strains: V052-35_OLR1 to V052-35_OLR3                | 3 strains >8 mg/L   | 7 strains: V052-35_OLR4 to V052-35_OLR10                              | 7 strains >8 mg/L                                   |
| <b>V139-36</b>     | 11 strains: V139-36_OLR1 to V139-36_OLR11              | 11 strains >8 mg/L  | 30 strains: V139-36_OLR12 to V139-36_OLR41                            | 30 strains >8 mg/L                                  |
| <b>V180-37</b>     |                                                        |                     | 6 strains: V180-37_OLR1 to V180-37_OLR6                               | 6 strains >8 mg/L                                   |
| <b>V254-51</b>     |                                                        |                     | 22 strains: V254-51_OLR1 to V254-51_OLR22                             | 22 strains >8 mg/L                                  |
| <b>Af293</b>       |                                                        |                     | 11 strains: Af293_OLR3, to Af293_OLR13                                | 10 strains >8 mg/L, 1 strain 0.25 mg/L (Af293_OLR3) |

474

475

476 **Table S2. *Aspergillus fumigatus* strains used in the *in vivo* virulence model**

| Strain              | PyrE amino acid substitution | Intended inoculum (CFU/mL) | Intended inoculum (CFU/mouse) | Actual inoculum (CFU/mL) | Actual inoculum (CFU/mouse) | Median survival time (hours post infection) | Statistical comparison to <sup>1</sup> AZN8196 or <sup>2</sup> Af293 |
|---------------------|------------------------------|----------------------------|-------------------------------|--------------------------|-----------------------------|---------------------------------------------|----------------------------------------------------------------------|
| <b>AZN8196</b>      | -                            | 5 x 10 <sup>5</sup>        | 1 x 10 <sup>5</sup>           | 5.05 x 10 <sup>5</sup>   | 1.01 x 10 <sup>5</sup>      | 68.13                                       | -                                                                    |
| <b>AZN8196_OLR1</b> | G119V                        | 5 x 10 <sup>5</sup>        | 1 x 10 <sup>5</sup>           | 4.10 x 10 <sup>5</sup>   | 8.20 x 10 <sup>4</sup>      | 89.75                                       | P=0.0065 <sup>1</sup>                                                |
| <b>AZN8196_OLR2</b> | G119C                        | 5 x 10 <sup>5</sup>        | 1 x 10 <sup>5</sup>           | 3.40 x 10 <sup>5</sup>   | 6.80 x 10 <sup>4</sup>      | 73.38                                       | NS <sup>1</sup>                                                      |
| <b>Af293</b>        | -                            | 2.5 x 10 <sup>7</sup>      | 5 x 10 <sup>6</sup>           | 2.15 x 10 <sup>7</sup>   | 4.30 x 10 <sup>6</sup>      | 45.25                                       | -                                                                    |
| <b>Af293_OLR5</b>   | G119S                        | 2.5 x 10 <sup>7</sup>      | 5 x 10 <sup>6</sup>           | 2.05 x 10 <sup>7</sup>   | 4.10 x 10 <sup>6</sup>      | 46.75                                       | NS <sup>2</sup>                                                      |
| <b>Af293_OLR7</b>   | G119C                        | 2.5 x 10 <sup>7</sup>      | 5 x 10 <sup>6</sup>           | 2.55 x 10 <sup>7</sup>   | 5.10 x 10 <sup>6</sup>      | 48.25                                       | NS <sup>2</sup>                                                      |
| <b>Af293_OLR9</b>   | G119V                        | 2.5 x 10 <sup>7</sup>      | 5 x 10 <sup>6</sup>           | 1.35 x 10 <sup>7</sup>   | 2.70 x 10 <sup>6</sup>      | 55.00                                       | P=0.0022 <sup>2</sup>                                                |

477 CFU: colony forming units. NS: not significant

478

479 **Figure 1. Olorofim resistance frequency.** Frequency of resistance observed of six *A.*  
480 *fumigatus* isolates when  $10^6$  to  $10^9$  spores were incubated on RPMI agar plates containing  
481 either 0.5mg/L olorofim (OLO), 4 mg/L voriconazole (VOR) or 8 mg/L itraconazole (ITC). *A.*  
482 *fumigatus* ATCC 204305 b. *A. fumigatus* AZN 8196 c. *A. fumigatus* V052-35 (TR<sub>34</sub>/L98H,  
483 azole resistant) d. *A. fumigatus* V139-36 e. *A. fumigatus* V180-37 and f. *A. fumigatus* V254-  
484 51). \* P=<0.05 \*\* P=<0.01, ns Not significant.

485

486 **Figure 2. IC50s of wildtype and mutant DHODH.** The inhibition of DHODH activity by a  
487 range of olorofim concentrations was measured for the recombinant wild type Af293  
488 enzyme and the Gly119 mutants indicated. Lines were fitted using log(inhibitor) vs  
489 response – Variable slope (four parameters) in Graphpad Prism. R squares were 0.998 for  
490 Af\_DHODH (WT), 0.556 for Af\_DHODH (G119V), 0.924 for Af\_DHODH (G119A), 1,000 for  
491 Af\_DHODH (G119S) and 0.9680 for Af\_DHODH (G119C).

492

493 **Figure 3. Radial growth rate of isolate AZN8196 and Af293 and olorofim resistant**  
494 **progeny.** Colony diameters are displayed for a. isolate AZN8196 and 2 olorofim resistant  
495 progeny isolates AZN8196\_OLR1 (G119V) and AZN8196\_OLR2 (G119C) with and b. Af293,  
496 Af293\_OLR5 (, Af293\_OLR7 (G119S) Af293\_OLR9 (G119V)

497

498 **Figure 4. In vivo virulence model.** Survival of mice inoculated with a. olorofim wildtype  
499 strain AZN8196 and olorofim resistant progeny AZN8196\_OLR1 and AZN8196\_OLR2, and  
500 b. olorofim wildtype strain Af293 and olorofim resistant progeny Af293\_OLR5, Af293\_OLR7  
501 and Af293\_OLR9. Eight mice were inoculated with each strain.

502

503



504 **Figure S1.** Details of CRISPR-Cas9 components for introducing the G119C mutation in *A.*  
505 *fumigatus* *PyrE* gene. Amino acid 100 to 138 of the *PyrE* gene are shown. The hotspot  
506 region G119, the guide RNA (AGAGGCGCATCATATTGGTG) and PAM site (TTG) are  
507 annotated. Furthermore the mutations in the single stranded DNA repair template compared  
508 to WT *PyrE* sequence are noted. The G>T in locus G119 results in formation of Cysteine.  
509 The G>A mutation in the PAM site leads to a synonymous mutation. This mutation results in  
510 the incapability of binding of the ribonucleoprotein complex due to disruption of the PAM  
511 site.

512

513 **Figure S2.** Alignment of *PyrE* sequence of the *pyrE* wildtype MFIG001 strain and the  
514 MFIG001\_*pyrE*<sup>G119C</sup>\_01, MFIG001\_*pyrE*<sup>G119C</sup>\_03 and MFIG001\_*pyrE*<sup>G119C</sup>\_05 strains. The  
515 G119 locus is marked in yellow. The PAM site is marked in green and the introduced G119C  
516 mutation and synonymous PAM site mutations are marked in red.

517

518

519 **References**

- 520 1. Bongomin F, Gago S, Oladele RO, Denning DW. 2017. Global and multi-national prevalence of  
521 fungal diseases-estimate precision. *J Fungi (Basel)* 3:E57.
- 522 2. van de Veerdonk FL, Kolwijck E, Lestrade PP, Hodiament CJ, Rijnders BJ, van Paassen J, Haas  
523 PJ, Oliveira Dos Santos C, Kampinga GA, Bergmans DC, van Dijk K, de Haan AF, van Dissel J,  
524 van der Hoeven HG, Verweij PE, Dutch Mycoses Study G. 2017. Influenza-associated  
525 aspergillosis in critically ill patients. *Am J Respir Crit Care Med* 196:524-527.
- 526 3. Schauwvlieghe A, Rijnders BJA, Philips N, Verwijs R, Vanderbeke L, Van Tienen C, Lagrou K,  
527 Verweij PE, Van de Veerdonk FL, Gommers D, Spronk P, Bergmans D, Hoedemaekers A,  
528 Andrinopoulou ER, van den Berg C, Juffermans NP, Hodiament CJ, Vonk AG, Depuydt P,  
529 Boelens J, Wauters J, Dutch-Belgian Mycosis study g. 2018. Invasive aspergillosis in patients  
530 admitted to the intensive care unit with severe influenza: a retrospective cohort study.  
531 *Lancet Respir Med* 6:782-792.
- 532 4. White PL, Dhillion R, Cordey A, Hughes H, Faggian F, Soni S, Pandey M, Whitaker H, May A,  
533 Morgan M, Wise MP, Healy B, Blyth I, Price JS, Vale L, Posso R, Kronka J, Blackwood A,  
534 Rafferty H, Moffitt A, Tsitsopoulou A, Gaur S, Holmes T, Backx M. 2020. A national strategy to  
535 diagnose COVID-19 associated invasive fungal disease in the ICU. *Clin Infect Dis*  
536 doi:10.1093/cid/ciaa1298.
- 537 5. Lamoth F, Glampedakis E, Boillat-Blanco N, Oddo M, Pagani JL. 2020. Incidence of invasive  
538 pulmonary aspergillosis among critically ill COVID-19 patients. *Clin Microbiol Infect*  
539 doi:10.1016/j.cmi.2020.07.010.
- 540 6. Dupont D, Menotti J, Turc J, Miossec C, Wallet F, Richard JC, Argaud L, Paulus S, Wallon M,  
541 Ader F, Persat F. 2020. Pulmonary aspergillosis in critically ill patients with Coronavirus  
542 Disease 2019 (COVID-19). *Med Mycol* doi:10.1093/mmy/myaa078.
- 543 7. Patterson TF, Thompson GR, 3rd, Denning DW, Fishman JA, Hadley S, Herbrecht R,  
544 Kontoyiannis DP, Marr KA, Morrison VA, Nguyen MH, Segal BH, Steinbach WJ, Stevens DA,  
545 Walsh TJ, Wingard JR, Young JA, Bennett JE. 2016. Practice guidelines for the diagnosis and  
546 management of aspergillosis: 2016 update by the Infectious Diseases Society of America. *Clin*  
547 *Infect Dis* 63:e1-e60.
- 548 8. Ullmann AJ, Aguado JM, Arikan-Akdagli S, Denning DW, Groll AH, Lagrou K, Lass-Flörl C, Lewis  
549 RE, Muñoz P, Verweij PE, Warris A, Ader F, Akova M, Arendrup MC, Barnes RA, Beigelman-  
550 Aubry C, Blot S, Bouza E, Brüggemann RJM, Buchheidt D, Cadranel J, Castagnola E,  
551 Chakrabarti A, Cuenca-Estrella M, Dimopoulos G, Fortun J, Gangneux JP, Garbino J, Heinz WJ,  
552 Herbrecht R, Heussel CP, Kibbler CC, Klimko N, Kullberg BJ, Lange C, Lehrnbecher T, Löffler J,  
553 Lortholary O, Maertens J, Marchetti O, Meis JF, Pagano L, Ribaud P, Richardson M, Roilides E,  
554 Ruhnke M, Sanguinetti M, Sheppard DC, Sinko J, Skiada A, et al. 2018. Diagnosis and  
555 management of *Aspergillus* diseases: executive summary of the 2017 ESCMID-ECMM-ERS  
556 guideline. *Clin Microbiol Infect* 24 Suppl 1:e1-e38.
- 557 9. Verweij PE, Chowdhary A, Melchers WJ, Meis JF. 2016. Azole resistance in *Aspergillus*  
558 *fumigatus*: can we retain the clinical use of mold-active antifungal azoles? *Clin Infect Dis*  
559 62:362-8.
- 560 10. Buil JB, Snelders E, Denardi LB, Melchers WJG, Verweij PE. 2019. Trends in Azole Resistance  
561 in *Aspergillus fumigatus*, the Netherlands, 1994-2016. *Emerg Infect Dis* 25:176-178.
- 562 11. Lestrade PPA, Buil JB, van der Beek MT, Kuijper EJ, van Dijk K, Kampinga GA, Rijnders BJA,  
563 Vonk AG, de Greeff SC, Schoffelen AF, van Dissel J, Meis JF, Melchers WJG, Verweij PE. 2020.  
564 Paradoxal trends in azole-resistant *Aspergillus fumigatus* in a national multicenter  
565 surveillance program, the Netherlands, 2013-2018. *Emerg Infect Dis* 26:1447-1455.
- 566 12. Lestrade PP, Bentvelsen RG, Schauwvlieghe A, Schalekamp S, van der Velden W, Kuiper EJ,  
567 van Paassen J, van der Hoven B, van der Lee HA, Melchers WJG, de Haan AF, van der Hoeven  
568 HL, Rijnders BJA, van der Beek MT, Verweij PE. 2019. Voriconazole Resistance and Mortality

- 569 in Invasive Aspergillosis: A Multicenter Retrospective Cohort Study. *Clin Infect Dis* 68:1463-  
570 1471.
- 571 13. Jones ME. 1980. Pyrimidine nucleotide biosynthesis in animals: genes, enzymes, and  
572 regulation of UMP biosynthesis. *Annu Rev Biochem* 49:253-79.
- 573 14. Oliver JD, Sibley GE, Beckmann N, Dobb KS, Slater MJ, McEntee L, du Pre S, Livermore J,  
574 Bromley MJ, Wiederhold NP, Hope WW, Kennedy AJ, Law D, Birch M. 2016. F901318  
575 represents a novel class of antifungal drug that inhibits dihydroorotate dehydrogenase. *Proc*  
576 *Natl Acad Sci U S A* doi:10.1073/pnas.1608304113.
- 577 15. Astvad KMT, Jørgensen KM, Hare RK, Datcu R, Arendrup MC. 2020. Olorofim susceptibility  
578 testing of 1423 Danish mould isolates 2018-2019 confirms uniform and broad-spectrum  
579 activity. *Antimicrob Agents Chemother* doi:10.1128/aac.01527-20.
- 580 16. du Pré S, Beckmann N, Almeida MC, Sibley GEM, Law D, Brand AC, Birch M, Read ND, Oliver  
581 JD. 2018. Effect of the Novel Antifungal Drug F901318 (Olorofim) on Growth and Viability of  
582 *Aspergillus fumigatus*. *Antimicrob Agents Chemother* 62:e00231-18.
- 583 17. Jørgensen KM, Astvad KMT, Hare RK, Arendrup MC. 2018. EUCAST Determination of Olorofim  
584 (F901318) Susceptibility of Mold Species, Method Validation, and MICs. *Antimicrob Agents*  
585 *Chemother* 62:e00487-18.
- 586 18. Seyedmousavi S, Chang YC, Law D, Birch M, Rex JH, Kwon-Chung KJ. 2019. Efficacy of  
587 Olorofim (F901318) against *Aspergillus fumigatus*, *A. nidulans*, and *A. tanneri* in Murine  
588 Models of Profound Neutropenia and Chronic Granulomatous Disease. *Antimicrob Agents*  
589 *Chemother* 63:e00129-19.
- 590 19. JB B, AJMM R, JF M, M B, D L, WJG M, PE V. 2017. In vitro activity of the novel antifungal  
591 compound F901318 against difficult-to-treat *Aspergillus* isolates. *The Journal of antimicrobial*  
592 *chemotherapy* doi:10.1093/jac/dkx177.
- 593 20. Rivero-Menendez O, Cuenca-Estrella M, Alastruey-Izquierdo A. 2019. In vitro activity of  
594 olorofim (F901318) against clinical isolates of cryptic species of *Aspergillus* by EUCAST and  
595 CLSI methodologies. *The Journal of antimicrobial chemotherapy* 74:1586-1590.
- 596 21. Negri CE, Johnson A, McEntee L, Box H, Whalley S, Schwartz JA, Ramos-Martín V, Livermore J,  
597 Kolamunnage-Dona R, Colombo AL, Hope WW. 2018. Pharmacodynamics of the Novel  
598 Antifungal Agent F901318 for Acute Sinopulmonary Aspergillosis Caused by *Aspergillus*  
599 *flavus*. *The Journal of infectious diseases* 217:1118-1127.
- 600 22. Hope WW, McEntee L, Livermore J, Whalley S, Johnson A, Farrington N, Kolamunnage-Dona  
601 R, Schwartz J, Kennedy A, Law D, Birch M, Rex JH. 2017. Pharmacodynamics of the  
602 Orotomides against *Aspergillus fumigatus*: New Opportunities for Treatment of Multidrug-  
603 Resistant Fungal Disease. *mBio* 8:e01157-17.
- 604 23. Kirchhoff L, Dittmer S, Buer J, Rath PM, Steinmann J. 2020. In vitro activity of olorofim  
605 (F901318) against fungi of the genus, *Scedosporium* and *Rasamsonia* as well as against  
606 *Lomentospora prolificans*, *Exophiala dermatitidis* and azole-resistant *Aspergillus fumigatus*.  
607 *Int J Antimicrob Agents* 56:106105.
- 608 24. Kirchhoff L, Dittmer S, Weisner AK, Buer J, Rath PM, Steinmann J. 2020. Antibiofilm activity of  
609 antifungal drugs, including the novel drug olorofim, against *Lomentospora prolificans*. *J*  
610 *Antimicrob Chemother* 75:2133-2140.
- 611 25. Rivero-Menendez O, Cuenca-Estrella M, Alastruey-Izquierdo A. 2020. In vitro activity of  
612 olorofim against clinical isolates of *Scedosporium* species and *Lomentospora prolificans* using  
613 EUCAST and CLSI methodologies. *J Antimicrob Chemother* doi:10.1093/jac/dkaa351.
- 614 26. Wiederhold NP, Law D, Birch M. 2017. Dihydroorotate dehydrogenase inhibitor F901318 has  
615 potent in vitro activity against *Scedosporium* species and *Lomentospora prolificans*. *J*  
616 *Antimicrob Chemother* doi:10.1093/jac/dkx065.
- 617 27. Biswas C, Law D, Birch M, Halliday C, Sorrell TC, Rex J, Slavin M, Chen SCA. 2018. In vitro  
618 activity of the novel antifungal compound F901318 against Australian *Scedosporium* and  
619 *Lomentospora* fungi. *Med Mycol* 56:1050-1054.

- 620 28. Wiederhold NP, Najvar LK, Jaramillo R, Olivo M, Birch M, Law D, Rex JH, Catano G, Patterson  
621 TF. 2018. The Orotomide Olorofim Is Efficacious in an Experimental Model of Central Nervous  
622 System Coccidioidomycosis. *Antimicrob Agents Chemother* 62:e00999-18.
- 623 29. Lim W, Eadie K, Konings M, Rijnders B, Fahal AH, Oliver JD, Birch M, Verbon A, van de Sande  
624 W. 2020. *Madurella mycetomatis*, the main causative agent of eumycetoma, is highly  
625 susceptible to olorofim. *J Antimicrob Chemother* 75:936-941.
- 626 30. Wiederhold NP. 2020. Review of the Novel Investigational Antifungal Olorofim. *J Fungi*  
627 (Basel) 6.
- 628 31. Lackner M, Birch M, Naschberger V, Grässle D, Beckmann N, Warn P, Gould J, Law D, Lass-  
629 Flörl C, Binder U. 2018. Dihydroorotate dehydrogenase inhibitor olorofim exhibits promising  
630 activity against all clinically relevant species within *Aspergillus* section *Terrei*. *The Journal of*  
631 *antimicrobial chemotherapy* 73:3068-3073.
- 632 32. Samson RA, Visagie CM, Houbraeken J, Hong SB, Hubka V, Klaassen CH, Perrone G, Seifert KA,  
633 Susca A, Tanney JB, Varga J, Kocsube S, Szigeti G, Yaguchi T, Frisvad JC. 2014. Phylogeny,  
634 identification and nomenclature of the genus *Aspergillus*. *Stud Mycol* 78:141-73.
- 635 33. van Rhijn N, Furukawa T, Zhao C, McCann BL, Bignell E, Bromley MJ. 2020. Development of a  
636 marker-free mutagenesis system using CRISPR-Cas9 in the pathogenic mould *Aspergillus*  
637 *fumigatus*. *Fungal genetics and biology : FG & B* 145:103479-103479.
- 638 34. Bertuzzi M, van Rhijn N, Krappmann S, Bowyer P, Bromley MJ, Bignell EM. 2020. On the  
639 lineage of *Aspergillus fumigatus* isolates in common laboratory use. *Med Mycol* 59:7-13.
- 640 35. Arendrup MC, Mavridou E, Mortensen KL, Snelders E, Frimodt-Moller N, Khan H, Melchers  
641 WJ, Verweij PE. 2010. Development of azole resistance in *Aspergillus fumigatus* during azole  
642 therapy associated with change in virulence. *PLoS One* 5:e10080.
- 643 36. Howard SJ, Cerar D, Anderson MJ, Albarrag A, Fisher MC, Pasqualotto AC, Laverdiere M,  
644 Arendrup MC, Perlin DS, Denning DW. 2009. Frequency and evolution of Azole resistance in  
645 *Aspergillus fumigatus* associated with treatment failure. *Emerg Infect Dis* 15:1068-76.
- 646 37. Ballard E, Melchers WJG, Zoll J, Brown AJP, Verweij PE, Warris A. 2018. In-host  
647 microevolution of *Aspergillus fumigatus*: A phenotypic and genotypic analysis. *Fungal Genet*  
648 *Biol* 113:1-13.
- 649 38. Bongomin F, Harris C, Hayes G, Kosmidis C, Denning DW. 2018. Twelve-month clinical  
650 outcomes of 206 patients with chronic pulmonary aspergillosis. *PLoS One* 13:e0193732.
- 651 39. Dudakova A, Spiess B, Tangwattanachuleeporn M, Sasse C, Buchheidt D, Weig M, Gross U,  
652 Bader O. 2017. Molecular Tools for the Detection and Deduction of Azole Antifungal Drug  
653 Resistance Phenotypes in *Aspergillus* Species. *Clin Microbiol Rev* 30:1065-1091.
- 654 40. Verweij PE, Snelders E, Kema GH, Mellado E, Melchers WJ. 2009. Azole resistance in  
655 *Aspergillus fumigatus*: a side-effect of environmental fungicide use? *Lancet Infect Dis* 9:789-  
656 95.
- 657 41. D'Enfert C, Diaquin M, Delit A, Wuscher N, Debeaupuis JP, Huerre M, Latge JP. 1996.  
658 Attenuated virulence of uridine-uracil auxotrophs of *Aspergillus fumigatus*. *Infect Immun*  
659 64:4401-5.
- 660 42. Retallack DM, Heinecke EL, Gibbons R, Deepe GS, Jr., Woods JP. 1999. The URA5 gene is  
661 necessary for *histoplasma capsulatum* growth during infection of mouse and human cells.  
662 *Infect Immun* 67:624-629.
- 663 43. Noble SM, Johnson AD. 2005. Strains and strategies for large-scale gene deletion studies of  
664 the diploid human fungal pathogen *Candida albicans*. *Eukaryot Cell* 4:298-309.
- 665 44. de Gontijo FA, Pascon RC, Fernandes L, Machado J, Jr., Alspaugh JA, Vallim MA. 2014. The  
666 role of the de novo pyrimidine biosynthetic pathway in *Cryptococcus neoformans* high  
667 temperature growth and virulence. *Fungal Genet Biol* 70:12-23.
- 668 45. Escribano P, Recio S, Peláez T, González-Rivera M, Bouza E, Guinea J. 2012. In vitro  
669 acquisition of secondary azole resistance in *Aspergillus fumigatus* isolates after prolonged  
670 exposure to itraconazole: presence of heteroresistant populations. *Antimicrob Agents*  
671 *Chemother* 56:174-8.

- 672 46. da Silva Ferreira ME, Capellaro JL, dos Reis Marques E, Malavazi I, Perlin D, Park S, Anderson  
673 JB, Colombo AL, Arthington-Skaggs BA, Goldman MHS, Goldman GH. 2004. In vitro evolution  
674 of itraconazole resistance in *Aspergillus fumigatus* involves multiple mechanisms of  
675 resistance. *Antimicrob Agents Chemother* 48:4405-4413.
- 676 47. Mellado E, Aufauvre-Brown A, Gow NA, Holden DW. 1996. The *Aspergillus fumigatus* chsC  
677 and chsG genes encode class III chitin synthases with different functions. *Mol Microbiol*  
678 20:667-79.
- 679 48. Paisley D, Robson GD, Denning DW. 2005. Correlation between in vitro growth rate and in  
680 vivo virulence in *Aspergillus fumigatus*. *Med Mycol* 43:397-401.
- 681 49. Verweij PE, Zhang J, Debets AJM, Meis JF, van de Veerdonk FL, Schoustra SE, Zwaan BJ,  
682 Melchers WJG. 2016. In-host adaptation and acquired triazole resistance in *Aspergillus*  
683 *fumigatus*: a dilemma for clinical management. *Lancet Infect Dis* 16:e251-e260.
- 684 50. Espinel-Ingroff A, Dawson K, Pfaller M, Anaissie E, Breslin B, Dixon D, Fothergill A, Paetznick  
685 V, Peter J, Rinaldi M, et al. 1995. Comparative and collaborative evaluation of standardization  
686 of antifungal susceptibility testing for filamentous fungi. *Antimicrob Agents Chemother*  
687 39:314-319.
- 688 51. Buil JB, van der Lee HAL, Rijs A, Zoll J, Hovestadt J, Melchers WJG, Verweij PE. 2017. Single-  
689 Center Evaluation of an Agar-Based Screening for Azole Resistance in *Aspergillus fumigatus*  
690 by Using VIPcheck. *Antimicrob Agents Chemother* 61.
- 691 52. Seyedmousavi S, Mouton JW, Melchers WJG, Verweij PE. 2017. In Vivo Efficacy of Liposomal  
692 Amphotericin B against Wild-Type and Azole-Resistant *Aspergillus fumigatus* Isolates in Two  
693 Different Immunosuppression Models of Invasive Aspergillosis. *Antimicrob Agents*  
694 *Chemother* 61:e02479-16.

695

## ATCC 204305

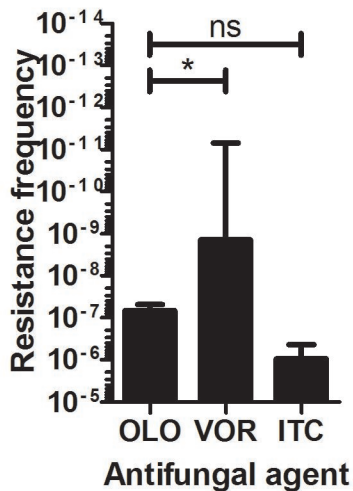

a.

## AZN8196

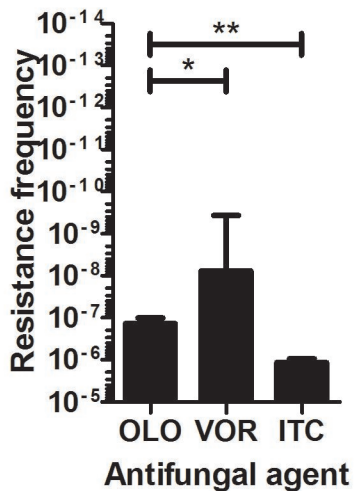

b.

## V052-35

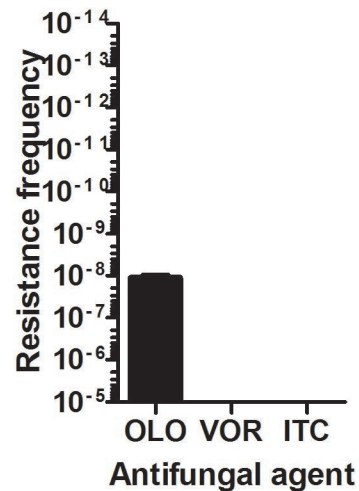

c.

## V139-36

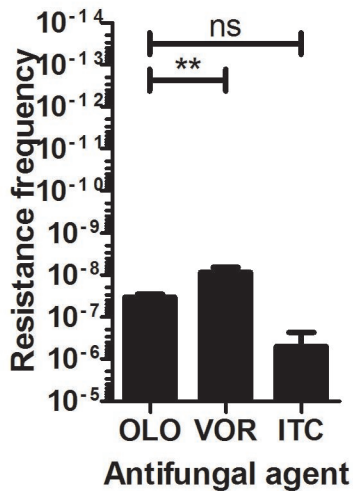

d.

## V180-37

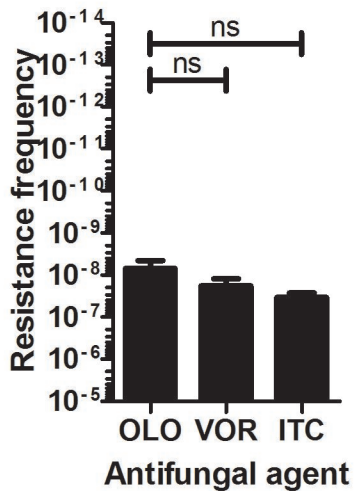

e.

## V254-51

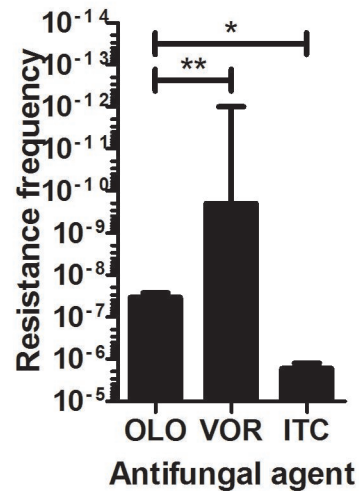

f.



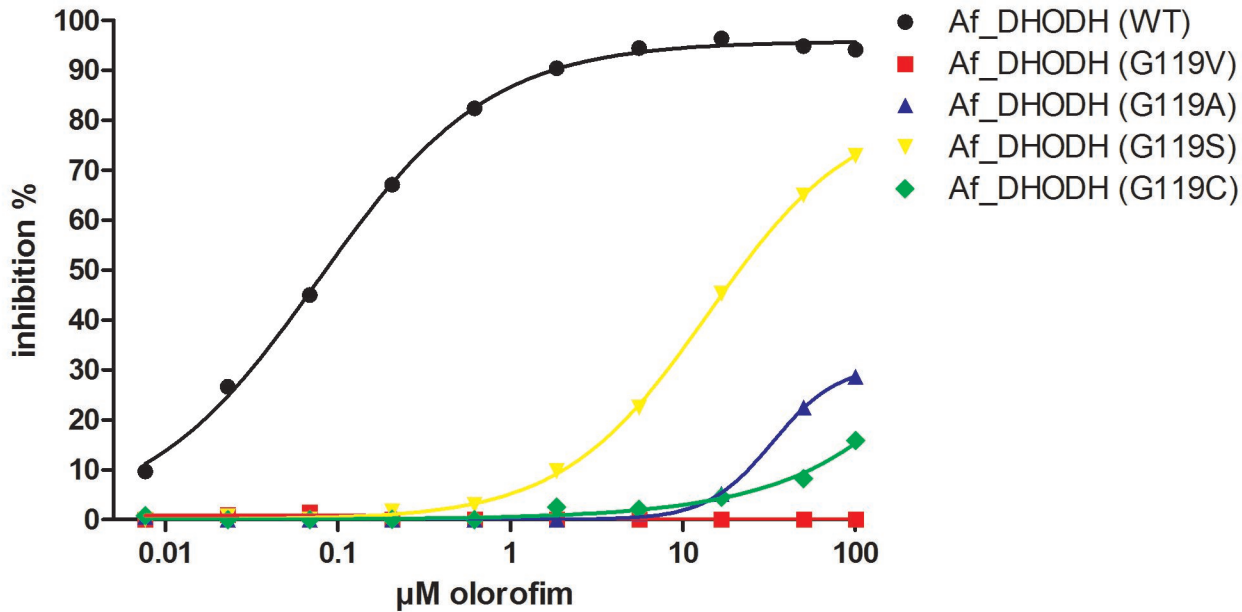

### Radial growth rate

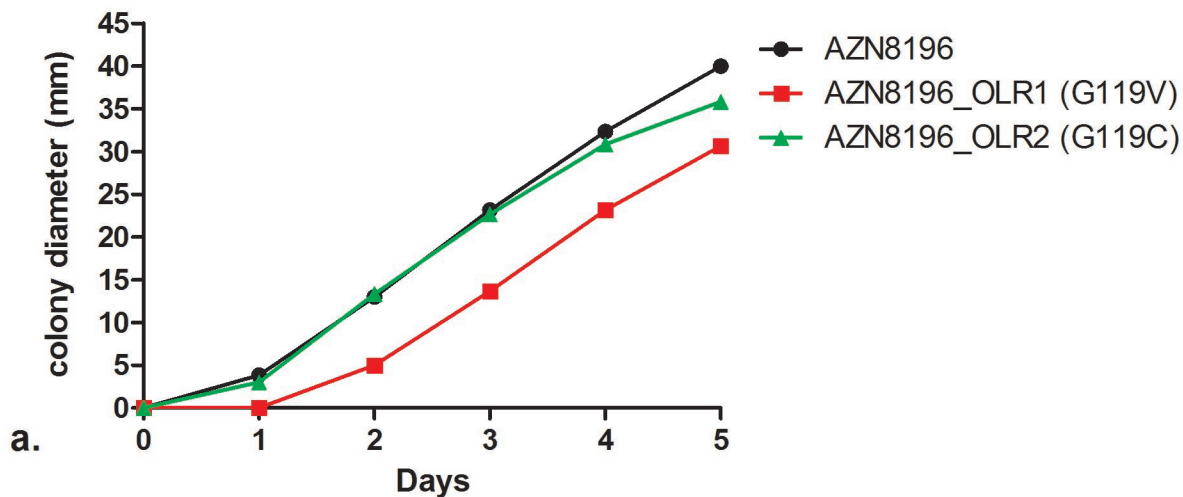

### Radial growth rate

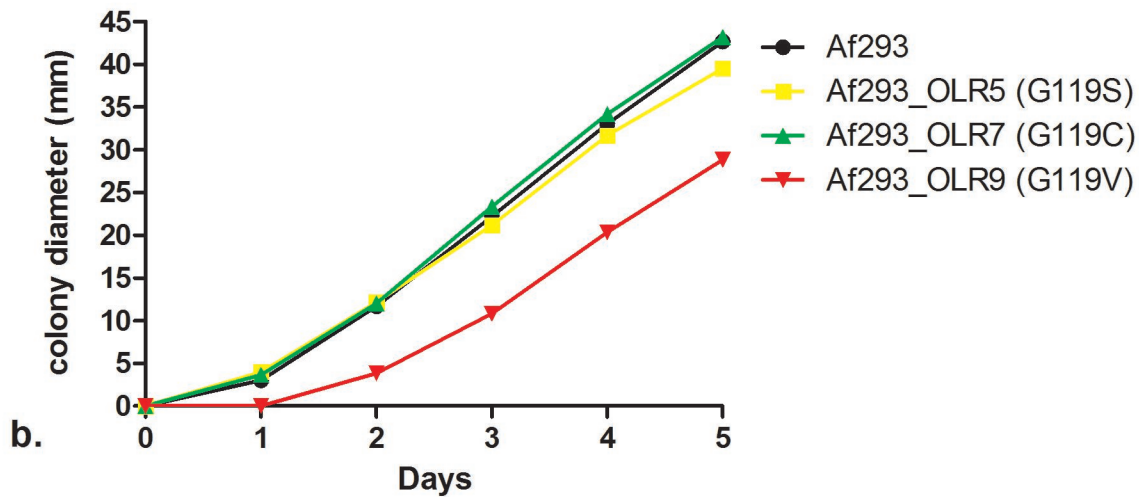



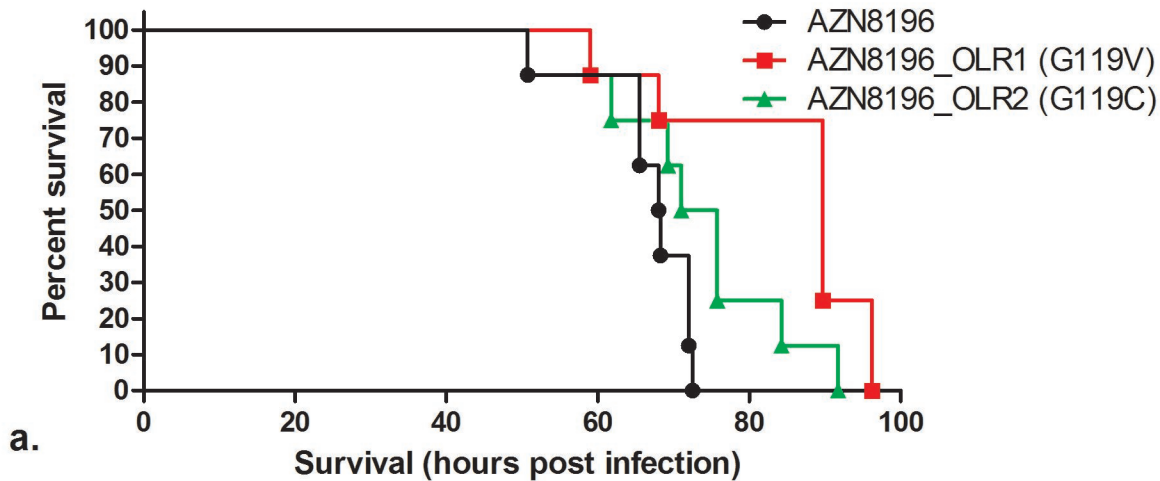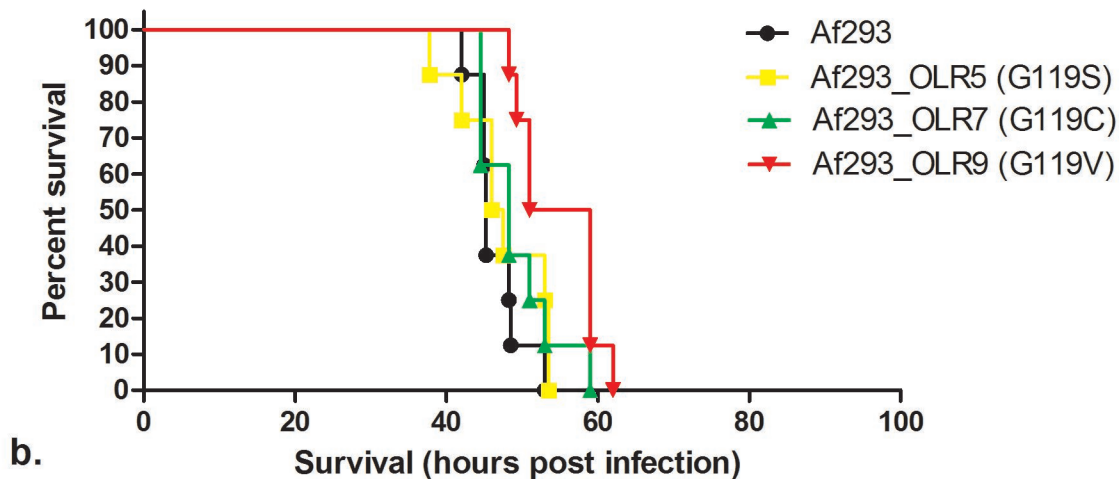

GCTGTGGTTCCTTGTCCGGACGCTTTATCCCGACGCGGAAGAGGCGCATCATATTGGTGTGGAAGCTCTGAAGACGCTCTACAAGTATGGACTTCATCCGCGGGAACGCGGCAAC  
100 102 104 106 108 110 112 114 116 118 120 122 124 126 128 130 132 134 136 138  
A V V P L V R T L Y P D A E E A H H I G V E A L K T L Y K Y G L H P R E R G N

GGT  
Locus G119

AGAGGCGCATCATATTGGTGTGG  
gRNA\_839 Guide RNA and PAM site

T A  
Mutations in ssDNA repair template to introduce G119C and adjustment of PAM site

ssDNA repair template  
TTCCTTGTCCGGACGCTTTATCCCGACGCGGAAGAGGCGCATCATATTTGTGTAGAAGCTCTGAAGACGCTCTACAAGTATGGACTTCATCCGCGGGA

MFIG001 671 745  
MFIG001\_pyrE<sup>g119c</sup> AGTAAAGGAGGCACCCAAGAAAGCTGGCCGCGGCCTCAAGAGAACGGTGTACGGAACATCGTTGGTACTCGCTGC  
AGTAAAGGAGGCACCCAAGAAAGCTGGCCGCGGCCTCAAGAGAACGGTGTACGGAACATCGTTGGTACTCGCTGC

MFIG001 746 820  
MFIG001\_pyrE<sup>g119c</sup> ATTGGTGGGTTATGTATATGCGACGGATAACCAGGGCAAGCATCCACCGCTATGCTGTGGTTCCTCTTGTCCGGAC  
ATTGGTGGGTTATGTATATGCGACGGATAACCAGGGCAAGCATCCACCGCTATGCTGTGGTTCCTCTTGTCCGGAC

MFIG001 821 895  
MFIG001\_pyrE<sup>g119c</sup> GCTTTATCCCGACGCGGAAGAGGCGCATCATATTGGTGTGGAAAGCTCTGAAGACGCTCTACAAGTATGGACTTCA  
GCTTTATCCCGACGCGGAAGAGGCGCATCATATTGGTGTGGAAAGCTCTGAAGACGCTCTACAAGTATGGACTTCA

MFIG001 896 970  
MFIG001\_pyrE<sup>g119c</sup> TCCGCGGGAACGCGGCAACCAGGACGGTGACGGCGTGTGGCTACTGAGGTAATACAGCCCTGACTTTTATAAATT  
TCCGCGGGAACGCGGCAACCAGGACGGTGACGGCGTGTGGCTACTGAGGTAATACAGCCCTGACTTTTATAAATT

MFIG001 971 1034  
MFIG001\_pyrE<sup>g119c</sup> GTCTGTTGCTTAGCTGAATTTGCCTATGCAGGTCTTCGGGTATACGCTCAACAACCCCATTTGGC  
GTCTGTTGCTTAGCTGAATTTGCCTATGCAGGTCTTCGGGTATACGCTCAACAACCCCATTTGGC
